# Supplementary material
Source: MDPI journal article supplement (https://www.mdpi.com/2076-0760/10/10/369)
Supplement: s1 [file s1]

## Supplementary Material S1

### *Tests of Longitudinal Measurement Invariance for all Study Variables*

|                                | Model fit            |        |       |       |       |        | Model comparison           |             |      |                    |                      |                     |
|--------------------------------|----------------------|--------|-------|-------|-------|--------|----------------------------|-------------|------|--------------------|----------------------|---------------------|
|                                | $\chi_{\text{SB}}^2$ | $df$   | CFI   | SRM   | RMSEA | Models | $\Delta\chi_{\text{SB}}^2$ | $\Delta df$ | $p$  | $\Delta\text{CFI}$ | $\Delta\text{RMSEA}$ | $\Delta\text{SRMR}$ |
|                                | R                    |        |       |       |       |        |                            |             |      |                    |                      |                     |
| Positive Youth Development     |                      |        |       |       |       |        |                            |             |      |                    |                      |                     |
| M1. Configural                 | 1796.00              | (1020) | 0.966 | 0.050 | 0.029 |        |                            |             |      |                    |                      |                     |
| M2. Metric                     | 1856.27              | (1076) | 0.966 | 0.053 | 0.028 | M2—M1  | 60.27                      | 56          | 0.32 | 0.000              | 0.000                | 0.003               |
| M3. Full scalar                | 2149.13              | (1198) | 0.954 | 0.055 | 0.032 | M3—M2  | 292.86                     | 122         | 0.01 | -0.012             | 0.003                | 0.002               |
| Parental psychological control |                      |        |       |       |       |        |                            |             |      |                    |                      |                     |
| M1. Configural                 | 686.61               | (410)  | 0.947 | 0.047 | 0.039 |        |                            |             |      |                    |                      |                     |
| M2. Metric                     | 710.26               | (431)  | 0.947 | 0.052 | 0.038 | M2—M1  | 23.65                      | 21          | 0.31 | 0.000              | -0.001               | 0.005               |
| M3. Full scalar                | 769.42               | (452)  | 0.939 | 0.055 | 0.039 | M3—M2  | 59.16                      | 21          | 0.01 | -0.008             | 0.001                | 0.003               |
| Parental support               |                      |        |       |       |       |        |                            |             |      |                    |                      |                     |
| M1. Configural                 | 325.61               | (222)  | 0.983 | 0.033 | 0.034 |        |                            |             |      |                    |                      |                     |
| M2. Metric                     | 358.25               | (236)  | 0.980 | 0.049 | 0.036 | M2—M1  | 32.64                      | 14          | 0.01 | -0.003             | 0.002                | 0.016               |
| M3. Full scalar                | 382.76               | (250)  | 0.979 | 0.049 | 0.036 | M3—M2  | 24.51                      | 14          | 0.04 | -0.001             | 0.000                | 0.000               |

*Note.*  $\Delta\chi_{SB}^2$  model comparisons are based on Satorra and Bentler's (2001) scaled difference chi-square test statistic. SRMR = standardized root mean square residual; CFI = comparative fit index; RMSEA = root mean square error of approximation;  $\Delta$  = change in parameter.

## Supplementary Material S2

### *Tests of Gender Measurement Invariance for all Study Variables*

|                                | Model fit     |           |       |       |       | Model comparison |                     |             |          |              |                |               |
|--------------------------------|---------------|-----------|-------|-------|-------|------------------|---------------------|-------------|----------|--------------|----------------|---------------|
|                                | $\chi_{SB}^2$ | <i>df</i> | CFI   | SRMR  | RMSEA | Models           | $\Delta\chi_{SB}^2$ | $\Delta df$ | <i>p</i> | $\Delta CFI$ | $\Delta RMSEA$ | $\Delta SRMR$ |
| Positive Youth Development     |               |           |       |       |       |                  |                     |             |          |              |                |               |
| M1. Configural                 | 790.88        | (186)     | 0.943 | 0.037 | 0.062 |                  |                     |             |          |              |                |               |
| M2. Metric                     | 836.18        | (214)     | 0.942 | 0.044 | 0.059 | M2—M1            | 45.30               | 28          | 0.02     | -0.001       | -0.003         | 0.007         |
| M3. Full scalar                | 997.70        | (225)     | 0.928 | 0.049 | 0.064 | M3—M2            | 161.52              | 11          | 0        | -0.014       | 0.005          | 0.005         |
| Parental psychological control |               |           |       |       |       |                  |                     |             |          |              |                |               |
| M1. Configural                 | 81.64         | (34)      | 0.949 | 0.039 | 0.081 |                  |                     |             |          |              |                |               |
| M2. Metric                     | 94.16         | (41)      | 0.943 | 0.060 | 0.077 | M2—M1            | 12.52               | 7           | 0.08     | -0.006       | 0.004          | 0.021         |
| M3. Full scalar                | 105.08        | (48)      | 0.939 | 0.063 | 0.074 | M3—M2            | 10.92               | 7           | 0.14     | -0.004       | 0.003          | 0.003         |
| Parental support               |               |           |       |       |       |                  |                     |             |          |              |                |               |
| M1. Configural                 | 76.69         | (38)      | 0.977 | 0.016 | 0.072 |                  |                     |             |          |              |                |               |
| M2. Metric                     | 87.92         | (45)      | 0.975 | 0.045 | 0.069 | M2—M1            | 11.69               | 7           | 0.11     | -0.003       | 0.002          | 0.016         |

|                 |        |      |       |       |       |       |       |   |      |        |       |       |
|-----------------|--------|------|-------|-------|-------|-------|-------|---|------|--------|-------|-------|
| M3. Full scalar | 100.67 | (52) | 0.971 | 0.050 | 0.069 | M3—M2 | 12.75 | 7 | 0.08 | -0.001 | 0.000 | 0.000 |
|-----------------|--------|------|-------|-------|-------|-------|-------|---|------|--------|-------|-------|

---

*Note.*  $\Delta\chi^2_{SB}$  model comparisons are based on Satorra and Bentler's (2001) scaled difference chi-square test statistic. SRMR = standardized root mean square residual; CFI = comparative fit index; RMSEA = root mean square error of approximation; 90% CI = 90% confidence interval;  $\Delta$  = change in parameter.
